# Supplementary material for: Prenatal Exposure to Glycol Ethers and Neurocognitive Abilities in 6-Year-Old Children: The PELAGIE Cohort Study
Source: PubMed Central journal article supplement (PMC5381990; doi:10.1289/ehp39), 2016-10-14
Supplement: EHP39.s001.acco.pdf [file EHP39.s001.acco.pdf]

**Note to readers with disabilities:** *EHP* strives to ensure that all journal content is accessible to all readers. However, some figures and Supplemental Material published in *EHP* articles may not conform to [508 standards](#) due to the complexity of the information being presented. If you need assistance accessing journal content, please contact [ehponline@niehs.nih.gov](mailto:ehponline@niehs.nih.gov). Our staff will work with you to assess and meet your accessibility needs within 3 working days.

## **Supplemental Material**

### **Prenatal Exposure to Glycol Ethers and Neurocognitive Abilities in 6-Year-Old Children: The PELAGIE Cohort Study**

Rémi Béranger, Ronan Garlantézec, Gaïd Le Maner-Idrissi, Agnès Lacroix, Florence Rouget, Jessica Trowbridge, Charline Warembourg, Christine Monfort, Florent Le Gléau, Marylène Jourdin, Luc Multigner, Sylvaine Cordier, and Cécile Chevrier

#### **Table of Contents**

**Table S1.** Characteristics of the study population compared to the rest of the cohort

**Figure S1.** Relation between log-transformed GE metabolite concentrations in mothers' prenatal urine samples and the WISC domains of their 6-year-old children

**Table S2.** Correlation between GE metabolites in mother's prenatal urine samples

**Table S3.** Associations between glycol ether metabolites and the WISC-IV scores of 6-year-old children in participants with no missing value for covariates (sensitivity analysis)

**Table S4.** Associations between PhAA concentrations in mothers' prenatal urine samples and the WISC-VCI domain of their 6-year-old children, after exclusion of statistical outliers (sensitivity analysis)

**Figure S2.** Relation between log-transformed PhAA concentrations in mothers' prenatal urine samples and the WISC-VCI domain of their 6-year-old children, after exclusion of statistical outliers (sensitivity analysis)

**Table S5.** Associations between concentrations of glycol ether metabolites and visuospatial skills (NEPSY) of 6-year-old children in participants with no missing values for covariates (sensitivity analysis)

**Table S1.** Characteristics of the study population compared to the rest of the cohort

| Characteristics at inclusion                             | Study population<br>(n=204)               | Other subjects<br>initially included in<br>the PELAGIE<br>cohort<br>(n=3256) | p-value |
|----------------------------------------------------------|-------------------------------------------|------------------------------------------------------------------------------|---------|
|                                                          | n (%) or mean $\pm$<br>standard deviation | n (%) or mean $\pm$<br>standard deviation                                    |         |
| <b>Maternal age at conception (year)</b>                 | 30.3 $\pm$ 4.2                            | 30.1 $\pm$ 4.3                                                               | 0.39    |
| <b>parity</b>                                            |                                           |                                                                              | 0.19    |
| <i>0</i>                                                 | 82 (40.2)                                 | 1458 (44.9)                                                                  |         |
| <i><math>\geq 1</math></i>                               | 122 (59.8)                                | 1786 (55.1)                                                                  |         |
| <b>Education</b>                                         |                                           |                                                                              | 0.14    |
| <i>&lt;12 years</i>                                      | 28 (13.8)                                 | 628 (19.3)                                                                   |         |
| <i>=12 years</i>                                         | 39 (19.2)                                 | 599 (18.4)                                                                   |         |
| <i>&gt;12 years</i>                                      | 136 (67.0)                                | 2158 (62.2)                                                                  |         |
| <b>Body mass index (kg.m<sup>-2</sup>)</b>               |                                           |                                                                              | 0.55    |
| <i><math>\leq 25</math></i>                              | 165 (80.9)                                | 2702 (83.0)                                                                  |         |
| <i>&gt;25</i>                                            | 39 (19.1)                                 | 554 (17.0)                                                                   |         |
| <b>Alcohol consumption during pregnancy</b>              |                                           |                                                                              | 0.31    |
| <i>No</i>                                                | 175 (87.5)                                | 2730 (84.9)                                                                  |         |
| <i>Yes</i>                                               | 25 (12.5)                                 | 487 (15.1)                                                                   |         |
| <b>Tobacco consumption at beginning of the pregnancy</b> |                                           |                                                                              | 0.17    |
| <i>None</i>                                              | 153 (76.1)                                | 2312 (71.8)                                                                  |         |
| <i><math>\geq 10</math> cig/day</i>                      | 36 (17.9)                                 | 593 (18.4)                                                                   |         |
| <i>&lt;10cig/day</i>                                     | 12 (6.0)                                  | 317 (9.9)                                                                    |         |

*Comparisons performed using  $\chi^2$  and Student tests.*

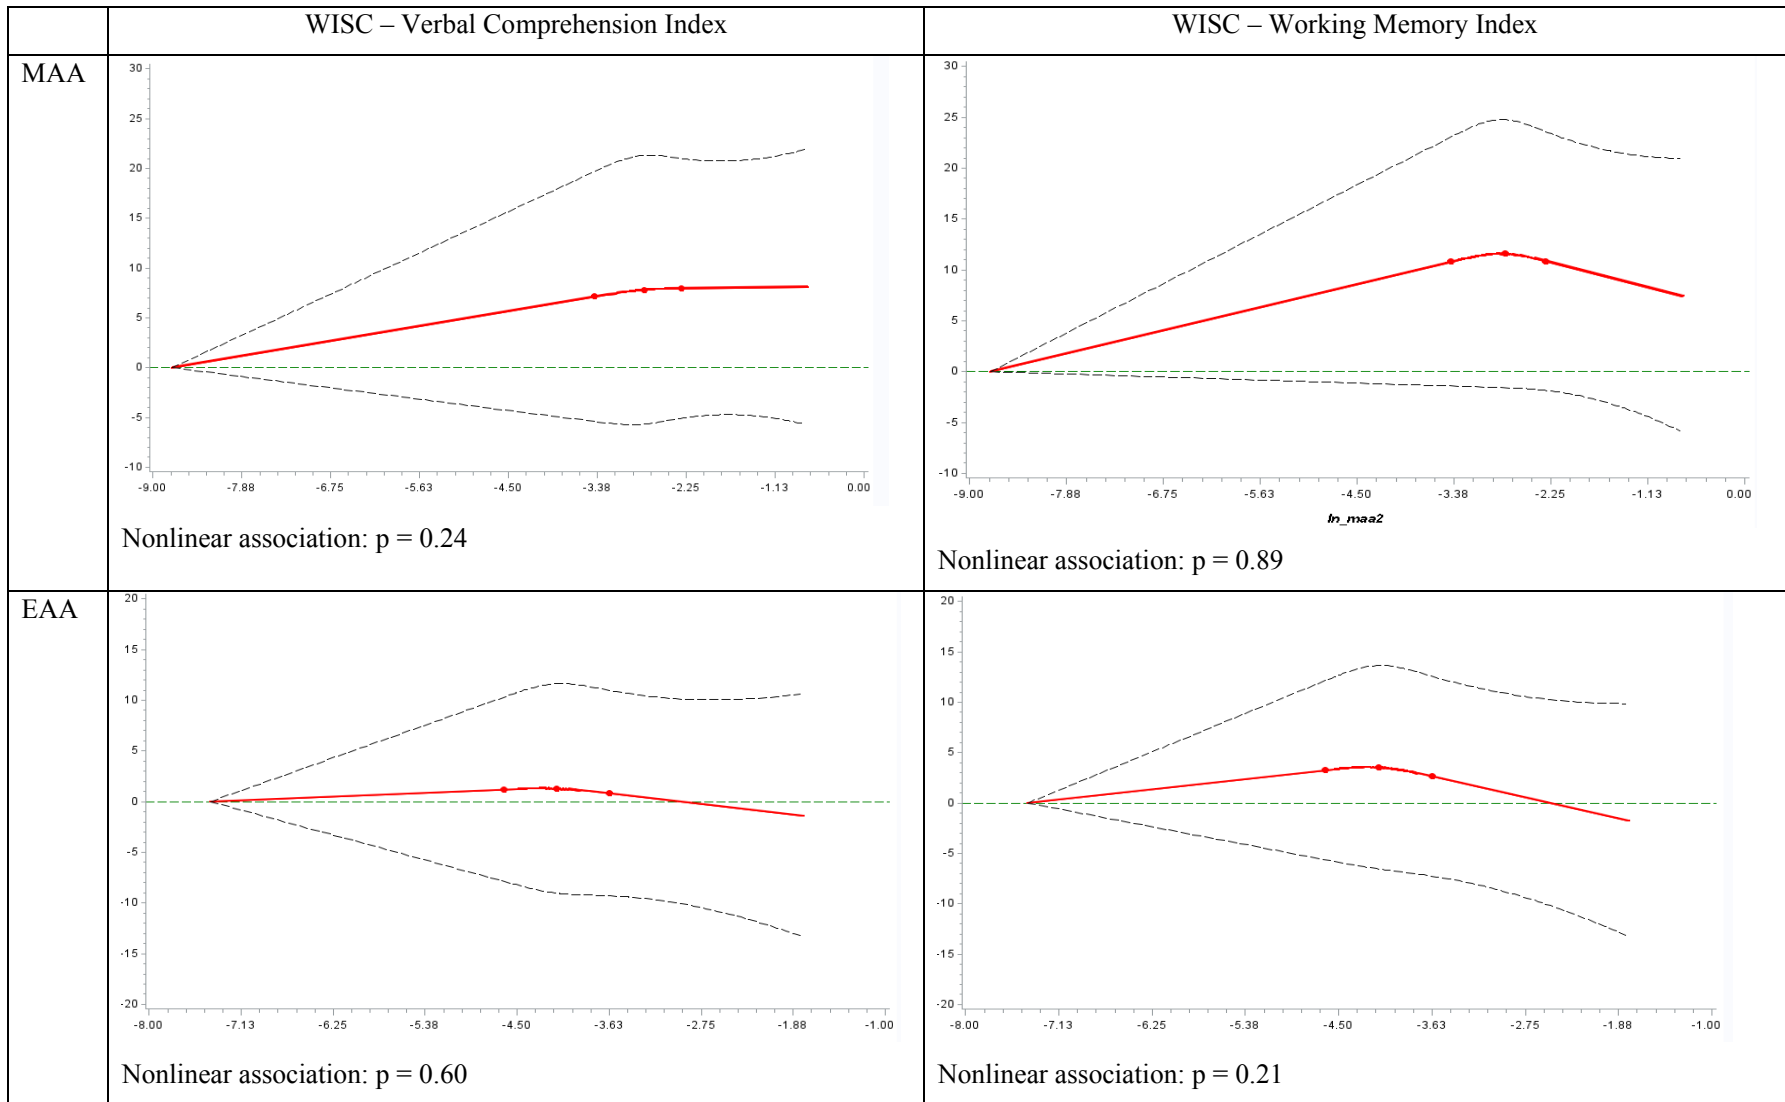

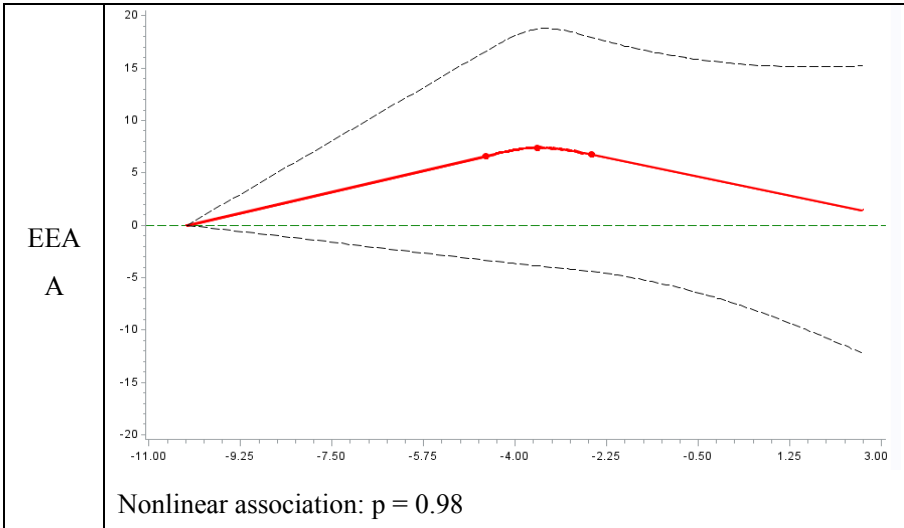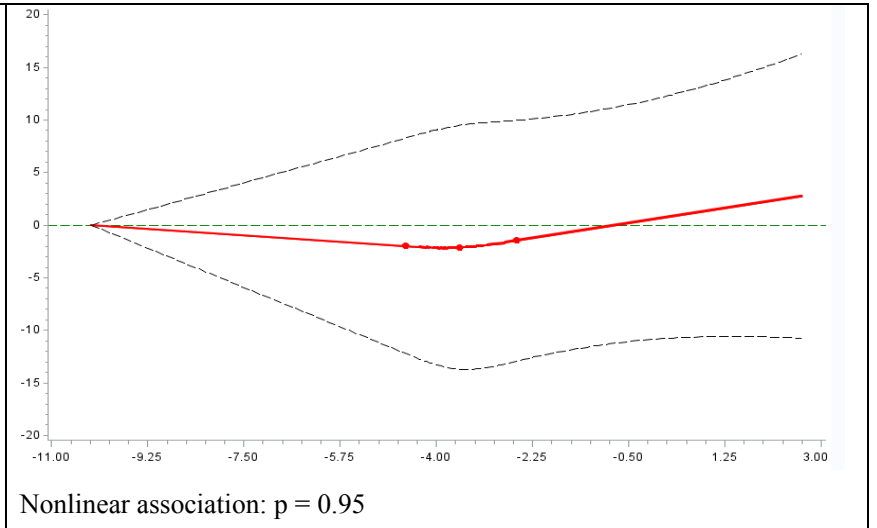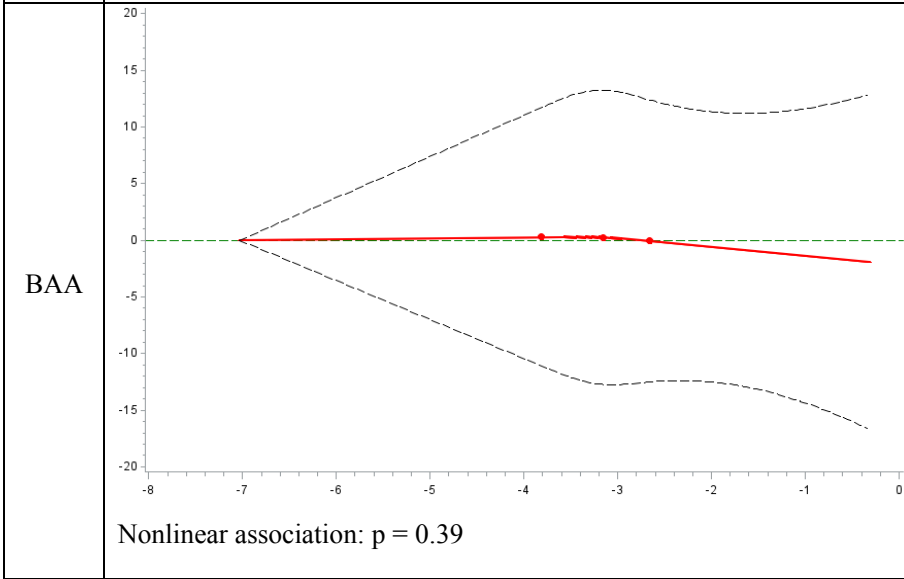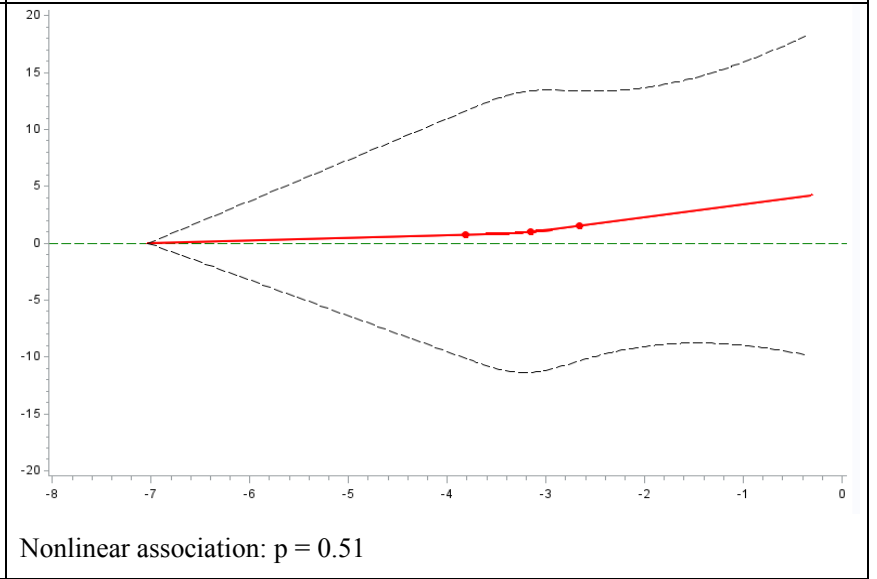

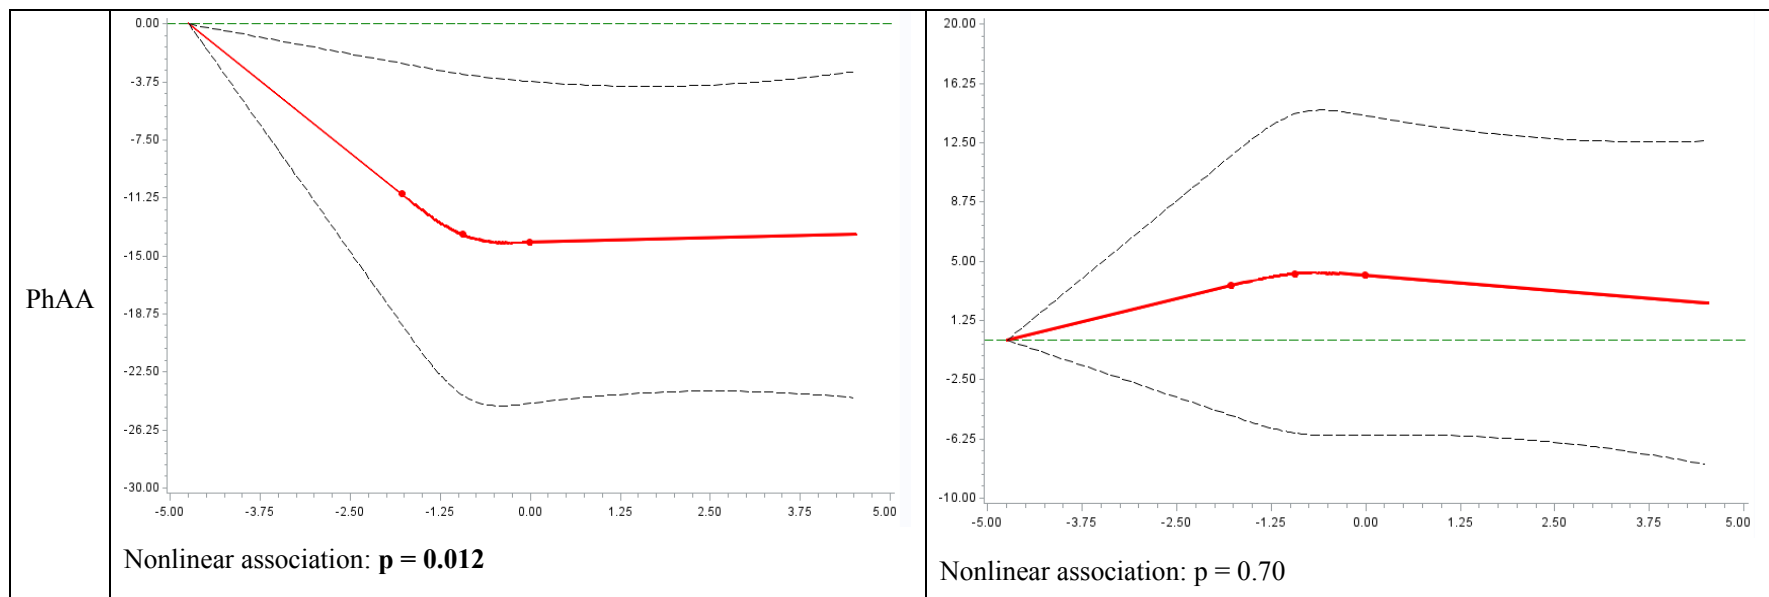

Adjusted restricted cubic spline (red, continuous line) adapted to linear model and 95% confidence interval (dotted black lines). The minimum detected urinary concentration was considered as the reference value for each model. We chose the 25th, 50th, and 75th percentiles as knots. Y-axis represents the change in WISC score. X-axis represents the log of the GE metabolite urinary concentration. Abbreviation: MAA, methoxyacetic acid; EAA, ethoxyacetic acid; EEAA, ethoxyethoxyacetic acid; BAA, 2-butoxyacetic acid; PhAA, phenoxyacetic acid. All adjusted models were adjusted for education, WAIS score, HOME score, creatinine concentration, and investigators. Additional adjustments were made for breastfeeding (MAA), alcohol consumption (EEAA), parity (BAA) and fish consumption (BAA). The assumption of linearity was rejected when the non-linear part of the restricted cubic spline model was statistically significant ( $p < 0.05$ ). WISC-IV scores are based on a scale with a mean of 100 and a standard deviation of 15 (min-max: 40-160).

**Figure S1.** Relation between log-transformed GE metabolite concentrations in mothers' prenatal urine samples and the WISC domains of their 6-year-old children

**Table S2.** Correlation between GE metabolites in mother's prenatal urine samples

|             |         | <b>MAA</b> | <b>EAA</b> | <b>E2AA</b> | <b>BAA</b> | <b>PHAA</b> |
|-------------|---------|------------|------------|-------------|------------|-------------|
| <b>MAA</b>  | rho     |            | 0,39       | 0,12        | 0,23       | -0,02       |
|             | p-value |            | <0,001     | 0,09        | 0,001      | 0,78        |
| <b>EAA</b>  | rho     | 0,39       |            | 0,20        | 0,33       | 0,11        |
|             | p-value | <0,001     |            | 0,003       | <0,001     | 0,10        |
| <b>E2AA</b> | rho     | 0,12       | 0,20       |             | 0,13       | 0,35        |
|             | p-value | 0,09       | 0,003      |             | 0,07       | <0,001      |
| <b>BAA</b>  | rho     | 0,23       | 0,33       | 0,13        |            | 0,08        |
|             | p-value | 0,001      | <0,001     | 0,07        |            | 0,26        |
| <b>PHAA</b> | rho     | -0,02      | 0,11       | 0,35        | 0,08       |             |
|             | p-value | 0,78       | 0,10       | <0,001      | 0,26       |             |

*Abbreviation: MAA, methoxyacetic acid; EAA, ethoxyacetic acid; E2AA, ethoxyethoxyacetic acid; BAA, 2-butoxyacetic acid; PhAA, phenoxyacetic acid. Correlation coefficient and p-value were estimated based on the Pearson correlation test. GE metabolites concentrations were log-transformed.*

**Table S3.** Associations between glycol ether metabolites and the WISC-IV scores of 6-year-old children in participants with no missing values for covariates and outcome (sensitivity analysis)

| Metabolite: mg/L | N   | WISC – Verbal Comprehension Index |                 | N   | WISC – Working Memory Index |               |
|------------------|-----|-----------------------------------|-----------------|-----|-----------------------------|---------------|
|                  |     | $\beta_{\text{adjusted}}$         | (95% CI)        |     | $\beta_{\text{adjusted}}$   | (95% CI)      |
| <b>MAA</b>       |     |                                   |                 |     |                             |               |
| ≤0.043           | 62  | ref                               |                 | 62  | ref                         |               |
| >0.043 – 0.081   | 60  | 1.21                              | (-4.04, 6.47)   | 58  | 0.16                        | (-4.71, 5.03) |
| >0.081           | 62  | 3.44                              | (-1.80, 8.67)   | 61  | -1.08                       | (-5.92, 3.75) |
| Continuous (log) | 184 | 1.03                              | (-0.88, 2.95)   | 181 | 0.69                        | (-1.08, 2.47) |
| <b>EAA</b>       |     |                                   |                 |     |                             |               |
| ≤0.011           | 63  | ref                               |                 | 63  | ref                         |               |
| >0.011-0.021     | 56  | 5.27                              | (-0.15, 10.70)  | 54  | 2.20                        | (-2.77, 7.18) |
| >0.021           | 65  | -0.37                             | (-5.83, 5.09)   | 64  | -2.54                       | (-7.57, 2.49) |
| Continuous (log) | 184 | 0.04                              | (-2.29, 2.37)   | 181 | -0.01                       | (-2.13, 2.12) |
| <b>EEAA</b>      |     |                                   |                 |     |                             |               |
| ≤0.016           | 57  | ref                               |                 | 57  | ref                         |               |
| >0.016-0.050     | 60  | 3.03                              | (-2.31, 8.37)   | 59  | 0.94                        | (-3.98, 5.87) |
| >0.050           | 67  | -1.65                             | (-7.11, 3.81)   | 65  | -1.03                       | (-6.09, 4.04) |
| Continuous (log) | 184 | -0.14                             | (-1.42, 1.14)   | 181 | -0.09                       | (-1.26, 1.09) |
| <b>BAA</b>       |     |                                   |                 |     |                             |               |
| ≤0.028           | 62  | ref                               |                 | 62  | ref                         |               |
| >0.028-0.058     | 58  | 0.56                              | (-4.80, 5.92)   | 57  | 0.22                        | (-4.75, 5.18) |
| >0.058           | 64  | -1.75                             | (-7.01, 3.51)   | 62  | -2.01                       | (-6.90, 2.87) |
| Continuous (log) | 184 | -0.18                             | (-2.51, 2.15)   | 181 | 0.65                        | (-1.50, 2.81) |
| <b>PhAA</b>      |     |                                   |                 |     |                             |               |
| ≤0.224           | 58  | ref                               |                 | 58  | ref                         |               |
| >0.224-0.781     | 61  | -6.04                             | (-11.33, -0.75) | 60  | -1.96                       | (-6.92, 2.99) |
| >0.781           | 65  | -7.64                             | (-12.90, -2.38) | 63  | -0.57                       | (-5.52, 4.38) |
| Continuous (log) | 184 | NA                                |                 | 191 | -0.36                       | (-1.44, 0.73) |

NA: Not applicable, significant departure from linearity based on restricted cubic spline model. Abbreviation: MAA, methoxyacetic acid; EAA, ethoxyacetic acid; EEAA, ethoxyethoxyacetic acid; BAA, 2-butoxyacetic acid; PhAA, phenoxyacetic acid. All adjusted models were adjusted for education, WAIS score, HOME score, creatinine concentration, and investigators. Additional adjustments were made for breastfeeding (MAA), alcohol consumption (EEAA), parity (BAA), and fish consumption (BAA). WISC-IV scores are based on a scale with a mean of 100 and a standard deviation of 15 (min-max: 40-160). Analyses were restricted to participants with no missing value for covariates or WISC subtests in any of the GE models for each association.

**Table S4.** Associations between PhAA concentrations in mothers’ prenatal urine samples and the WISC-VCI domain of their 6-year-old children, after exclusion of statistical outliers (sensitivity analysis)

| Metabolite: mg/L | N  | WISC – Verbal Comprehension<br>Index |
|------------------|----|--------------------------------------|
|                  |    | $\beta_{\text{adjusted}}$ (95% CI)   |
| <b>PhAA</b>      |    |                                      |
| ≤0.224           | 61 | ref                                  |
| >0.224-0.781     | 64 | -4.47 (-8.76, -0.17)                 |
| >0.781           | 66 | -5.29 (-9.64, -0.94)                 |

*Abbreviation: PhAA, phenoxyacetic acid. Model was adjusted for education, WAIS score, HOME score, creatinine concentration, and investigators. Overall, 13 Statistical outliers were excluded (studentized residuals below -2 or above 2).*



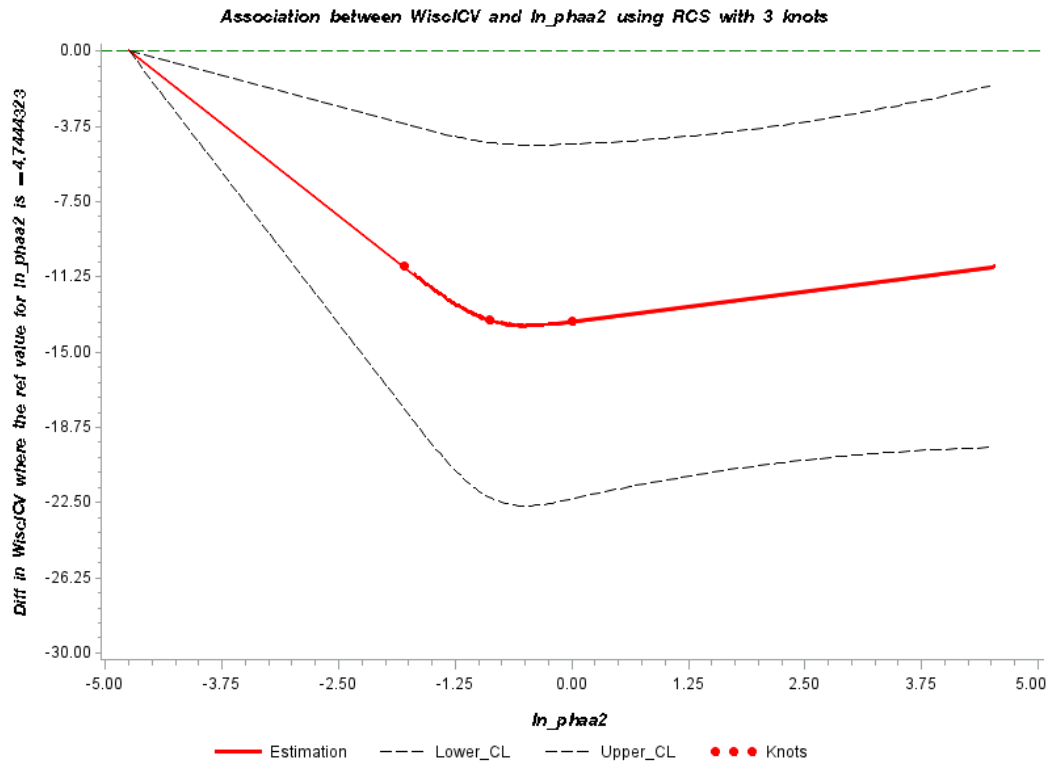

*Adjusted restricted cubic spline (red, continuous line) and 95% confidence interval (dotted black lines). We chose the 25th, 50th, and 75th percentiles as knots. Y-axis represents the change in WISC score. X-axis represents the log of the GE metabolite urinary concentration. Abbreviation: PhAA, phenoxyacetic acid. Model was adjusted for education, WAIS score, HOME score, creatinine concentration, and investigators. Overall, 13 Statistical outliers were excluded (studentized residuals below -2 or above 2).*

**Figure S2.** Relation between log-transformed PhAA concentrations in mothers' prenatal urine samples and the WISC-VCI domain of their 6-year-old children, after exclusion of statistical outliers (sensitivity analysis)

**Table S5.** Associations between concentrations of glycol ether metabolites and the visuospatial skills (NEPSY) of 6-year-old children in participants with no missing values for covariates and outcome (sensitivity analysis)

| Metabolite: mg/L | N   | NEPSY – Design Copying             |     | NEPSY - Arrows                     |  |
|------------------|-----|------------------------------------|-----|------------------------------------|--|
|                  |     | $\beta_{\text{adjusted}}$ (95% CI) | N   | $\beta_{\text{adjusted}}$ (95% CI) |  |
| <b>MAA</b>       |     |                                    |     |                                    |  |
| ≤0.043           | 65  | ref                                | 65  | ref                                |  |
| >0.043 – 0.081   | 63  | 0.01 (-0.09, 0.11)                 | 63  | 0.01 (-0.09, 0.11)                 |  |
| >0.081           | 66  | 0.03 (-0.07, 0.13)                 | 66  | 0.01 (-0.09, 0.11)                 |  |
| Continuous (log) | 194 | 0.02 (-0.02, 0.05)                 | 194 | 0.00 (-0.03, 0.04)                 |  |
| <b>EAA</b>       |     |                                    |     |                                    |  |
| ≤0.011           | 65  | ref                                | 65  | ref                                |  |
| >0.011-0.021     | 60  | 0.03 (-0.07, 0.14)                 | 60  | 0.01 (-0.10, 0.11)                 |  |
| >0.021           | 69  | -0.10 (-0.21, 0.00)                | 69  | -0.01 (-0.12, 0.09)                |  |
| Continuous (log) | 194 | -0.01 (-0.05, 0.03)                | 194 | 0.00 (-0.04, 0.05)                 |  |
| <b>EEAA</b>      |     |                                    |     |                                    |  |
| ≤0.016           | 64  | ref                                | 64  | ref                                |  |
| >0.016-0.050     | 62  | -0.07 (-0.17, 0.03)                | 62  | -0.08 (-0.18, 0.02)                |  |
| >0.050           | 68  | -0.10 (-0.20, 0.01)                | 68  | 0.00 (-0.11, 0.10)                 |  |
| Continuous (log) | 194 | -0.01 (-0.03, 0.01)                | 194 | 0.01 (-0.01, 0.03)                 |  |
| <b>BAA</b>       |     |                                    |     |                                    |  |
| ≤0.028           | 64  | ref                                | 64  | ref                                |  |
| >0.028-0.058     | 63  | -0.01 (-0.11, 0.09)                | 63  | 0.01 (-0.09, 0.11)                 |  |
| >0.058           | 67  | -0.03 (-0.13, 0.07)                | 67  | -0.05 (-0.15, 0.05)                |  |
| Continuous (log) | 194 | 0.01 (-0.04, 0.05)                 | 194 | -0.00 (-0.05, 0.04)                |  |
| <b>PhAA</b>      |     |                                    |     |                                    |  |
| ≤0.224           | 64  | ref                                | 64  | ref                                |  |
| >0.224-0.781     | 63  | 0.01 (-0.09, 0.11)                 | 63  | 0.05 (-0.05, 0.16)                 |  |
| >0.781           | 67  | -0.01 (-0.11, 0.09)                | 67  | 0.04 (-0.06, 0.14)                 |  |
| Continuous (log) | 194 | -0.01 (-0.03, 0.02)                | 194 | 0.01 (-0.02, 0.03)                 |  |

*Abbreviation: MAA, methoxyacetic acid; EAA, ethoxyacetic acid; EEAA, ethoxyethoxyacetic acid; BAA, 2-butoxyacetic acid; PhAA, phenoxyacetic acid. All adjusted models were adjusted for education, WAIS score, HOME score, creatinine concentration, and investigators. Additional adjustments were made for breastfeeding (MAA), number of cigarettes smoked per day in the household at age 6 (MAA, EEAA), prepregnancy maternal body mass index (EAA, EEAA, BAA), maternal age (EAA), household renovation likely to involve exposure to organic solvents (EAA), alcohol consumption (EEAA), parity (BAA,) and fish consumption (BAA). For each NEPSY subtest, the mean scaled score was 10 and the standard deviation was 3 (min-max: 1-19). Analyses were restricted to participants with no missing value for covariates or NEPSY scores in any of the GE models for each association.*
